# Supplementary material for: Pre-saccadic remapping relies on dynamics of spatial attention
Source: eLife journal article supplement (doi:10.7554/elife.37598), 2018-12-31
Supplement: supp [file elife-37598-supp-v1.zip]

Archive with 1 entries (1 files):
- elife_poa_e37598_Transparent_Reporting_File.pdf
